# Supplementary material for: Preparation of ZrO2via a microwave-assisted hydrothermal method and its catalytic performance for n-pentanal self-condensation
Source: Royal Society of Chemistry journal article supplement (doi:10.1039/d2nj05110a), 2022-12-17
Supplement: d2nj05110a1.pdf [file d2nj05110a1.pdf]

## SUPPLEMENTARY INFORMATION

### Preparation of ZrO<sub>2</sub> via Microwaved-Assisted Hydrothermal Method and its Catalytic Performance for *n*-Pentanal Self-Condensation

Han Yu, Rui Wang, Xinghua Zhao, Hualiang An\*, Xinqiang Zhao\*, Yanji Wang

#### List of Figures

**Fig. S1** FTIR spectra of ZrO<sub>2</sub> prepared at different microwave temperature (pH=3)

**Fig. S2** FTIR spectra of ZrO<sub>2</sub> prepared under different pH value (microwave temperature=200 °C)

**Fig. S3** N<sub>2</sub> adsorption-desorption isotherm and pore size distribution of ZrO<sub>2</sub> samples prepared at different pH value (microwave temperature=200 °C)

**Fig. S4** N<sub>2</sub> adsorption-desorption isotherms and pore size distribution of ZrO<sub>2</sub> samples prepared at different microwave temperature (pH=3)

**Fig. S5** NH<sub>3</sub>-TPD curves of different ZrO<sub>2</sub> samples

**Fig. S6** CO<sub>2</sub>-TPD curves of different ZrO<sub>2</sub> samples

**Fig. S7** NH<sub>3</sub>-TPD curves of the fresh and the recovered ZrO<sub>2</sub> catalysts

**Fig. S8** CO<sub>2</sub>-TPD curves of the fresh and the recovered ZrO<sub>2</sub> catalysts

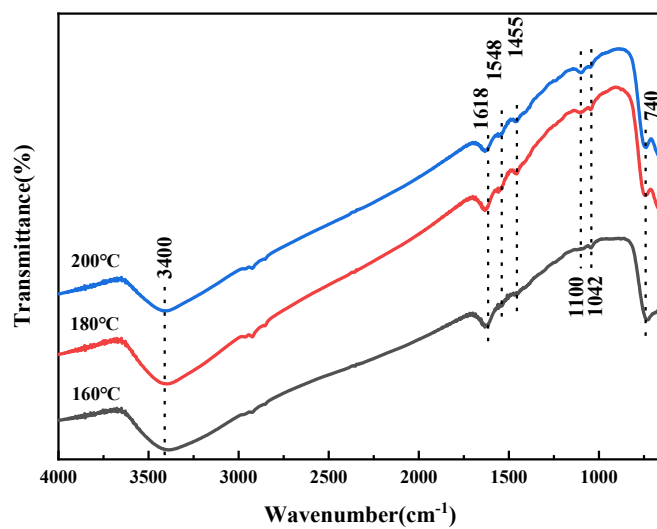

Fig. S1 FTIR spectra of  $ZrO_2$  prepared at different microwave temperature (pH=3)

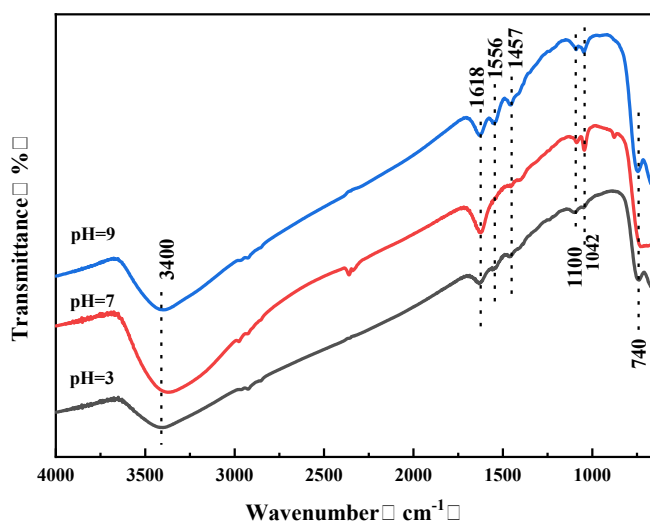

Fig. S2 FTIR spectra of  $ZrO_2$  prepared under different pH value (microwave temperature=200 °C)

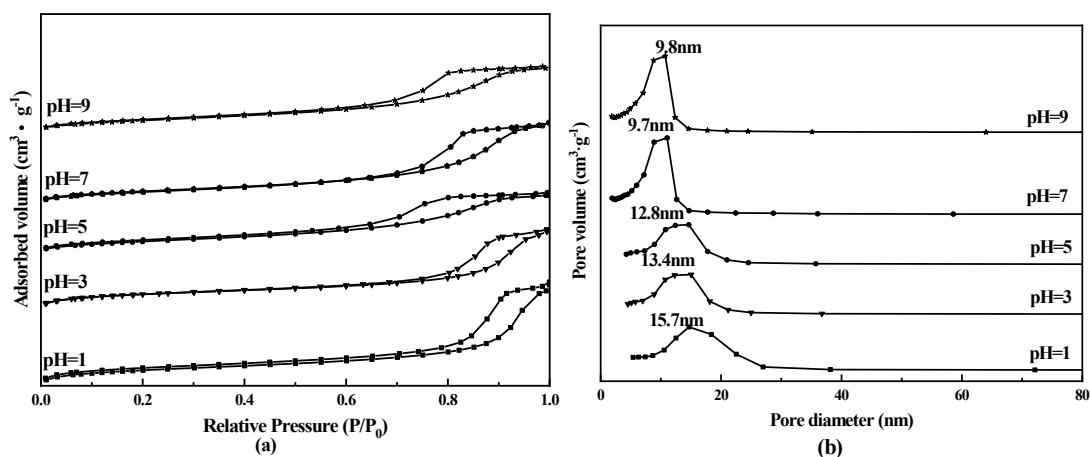

**Fig. S3**  $N_2$  adsorption-desorption isotherm and pore size distribution of  $ZrO_2$  samples prepared at different pH value (microwave temperature=200 °C)

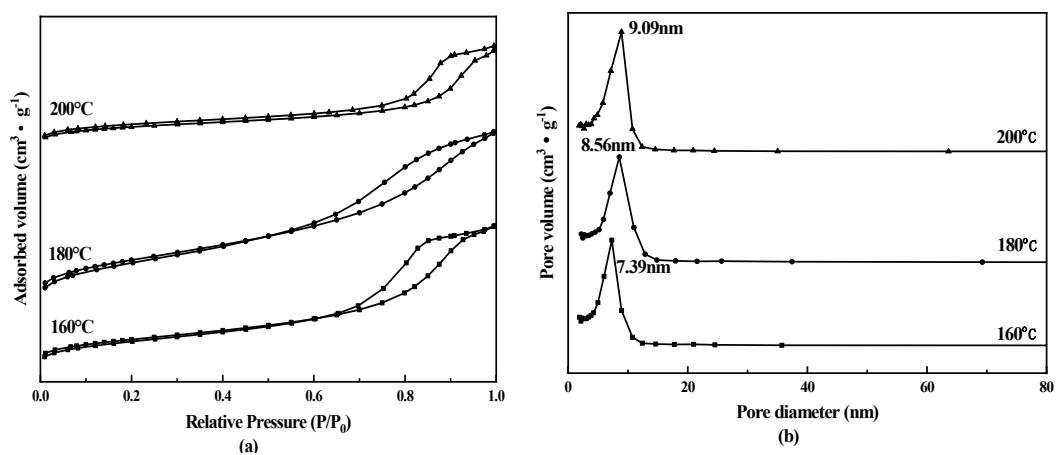

**Fig. S4**  $N_2$  adsorption-desorption isotherms and pore size distribution of  $ZrO_2$  samples prepared at different microwave temperature (pH=3)

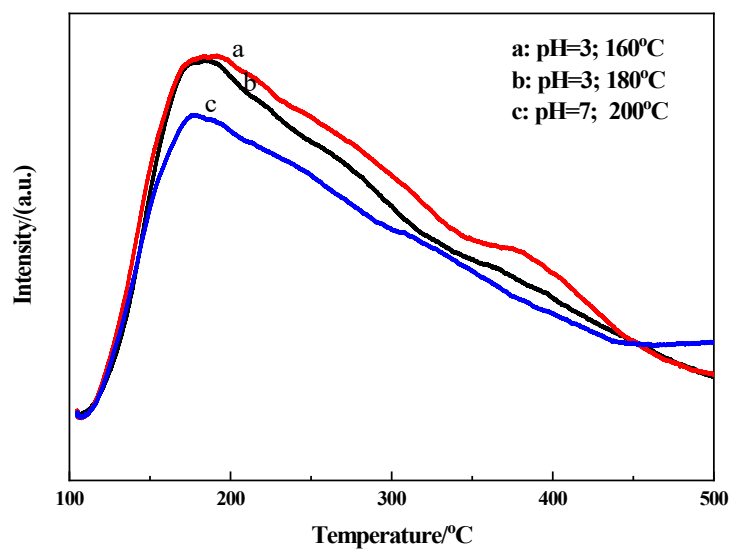

Fig. S5 NH<sub>3</sub>-TPD curves of different ZrO<sub>2</sub> samples

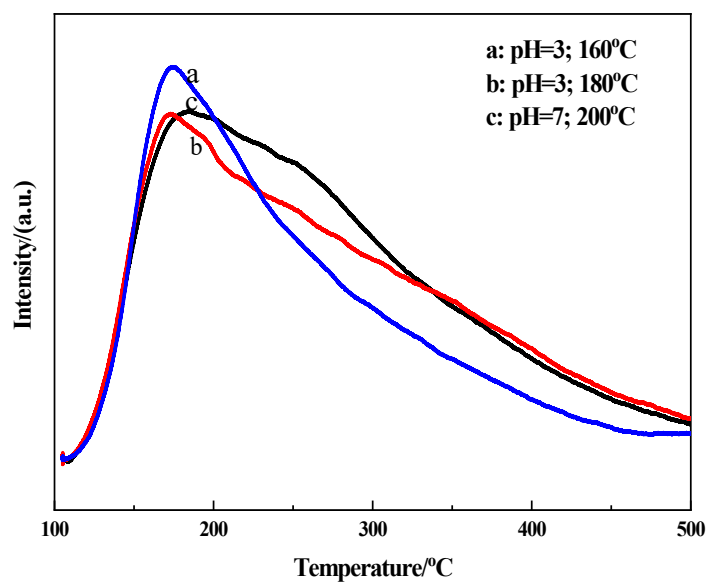

Fig. S6 CO<sub>2</sub>-TPD curves of different ZrO<sub>2</sub> samples

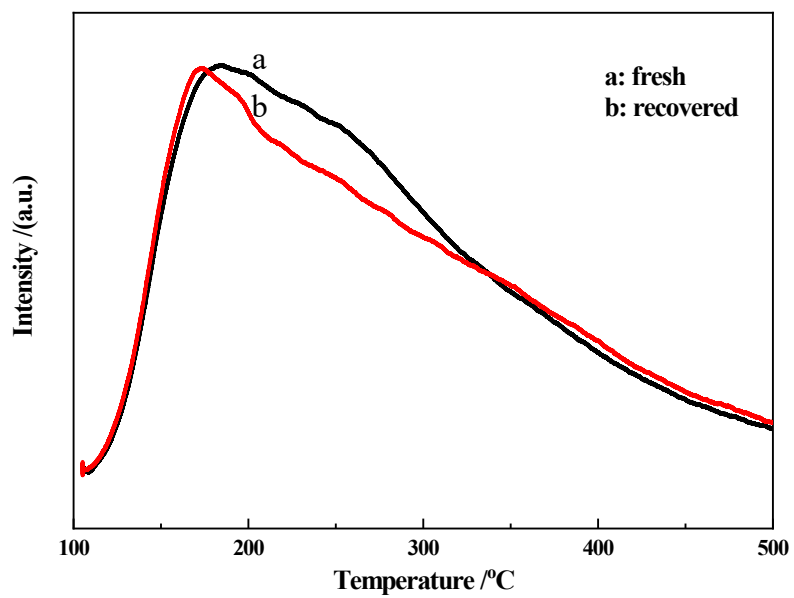

Fig. S7 NH<sub>3</sub>-TPD curves of the fresh and the recovered ZrO<sub>2</sub> catalysts

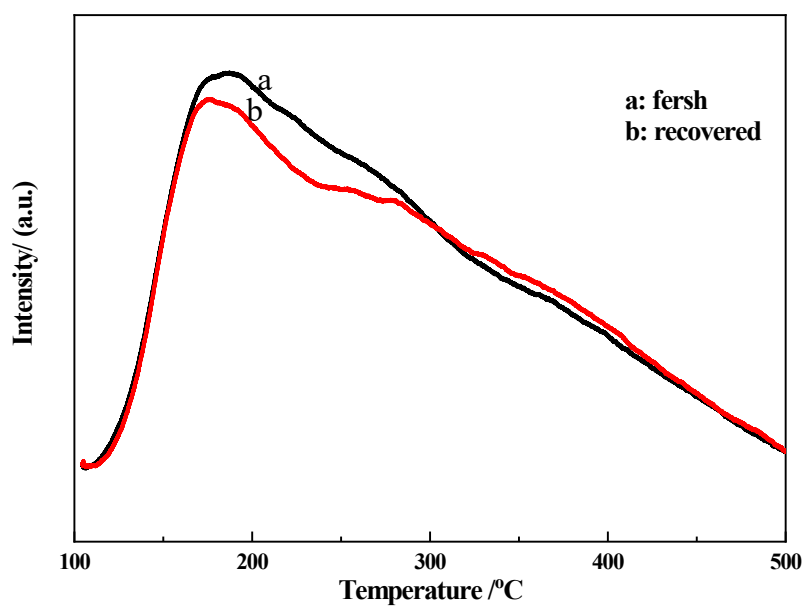

Fig. S8 CO<sub>2</sub>-TPD curves of the fresh and the recovered ZrO<sub>2</sub> catalysts
